# Supplementary material for: Three-dimensional bimodal pore-rich G/MXene sponge amalgamated with vanadium diselenide nanosheets as a high-performance electrode for electrochemical water-oxidation/reduction reactions
Source: Royal Society of Chemistry journal article supplement (doi:10.1039/d4dt00602j), 2024-01-01
Supplement: d4dt00602j1.pdf [file d4dt00602j1.pdf]

## Electronic Supplementary Information (ESI)

### Three-Dimensional Bimodal Pore-rich G/MXene Sponge Amalgamated with Vanadium Diselenide Nanosheets as High-Performance Electrode for Electrochemical Water- Oxidation/Reduction Reaction

Khadija Chaudhary<sup>a</sup>, Sonia Zulfiqar<sup>b,c</sup>, Zeid A. ALothman<sup>d</sup>, Imran Shakir<sup>d</sup>,  
Muhammad Farooq Warsi<sup>a\*</sup> and Eric W. Cochran<sup>c\*</sup>

<sup>a</sup>*Institute of Chemistry, Baghdad-ul-Jadeed Campus, The Islamia University of Bahawalpur,  
Bahawalpur, -63100, Pakistan*

<sup>b</sup>*Department of Chemistry, Faculty of Science, University of Ostrava, 30. Dubna 22, Ostrava 701  
03, Czech Republic*

<sup>c</sup>*Department of Chemical and Biological Engineering, Iowa State University, Sweeney Hall, 618  
Bissell Road, Ames, Iowa 50011, United States*

<sup>d</sup>*Department of Chemistry, College of Science, King Saud University, P. O. Box 2455, Riyadh  
11451, Saudi Arabia*

Corresponding authors: [farooq.warsi@iub.edu.pk](mailto:farooq.warsi@iub.edu.pk), [ecochran@iastate.edu](mailto:ecochran@iastate.edu)

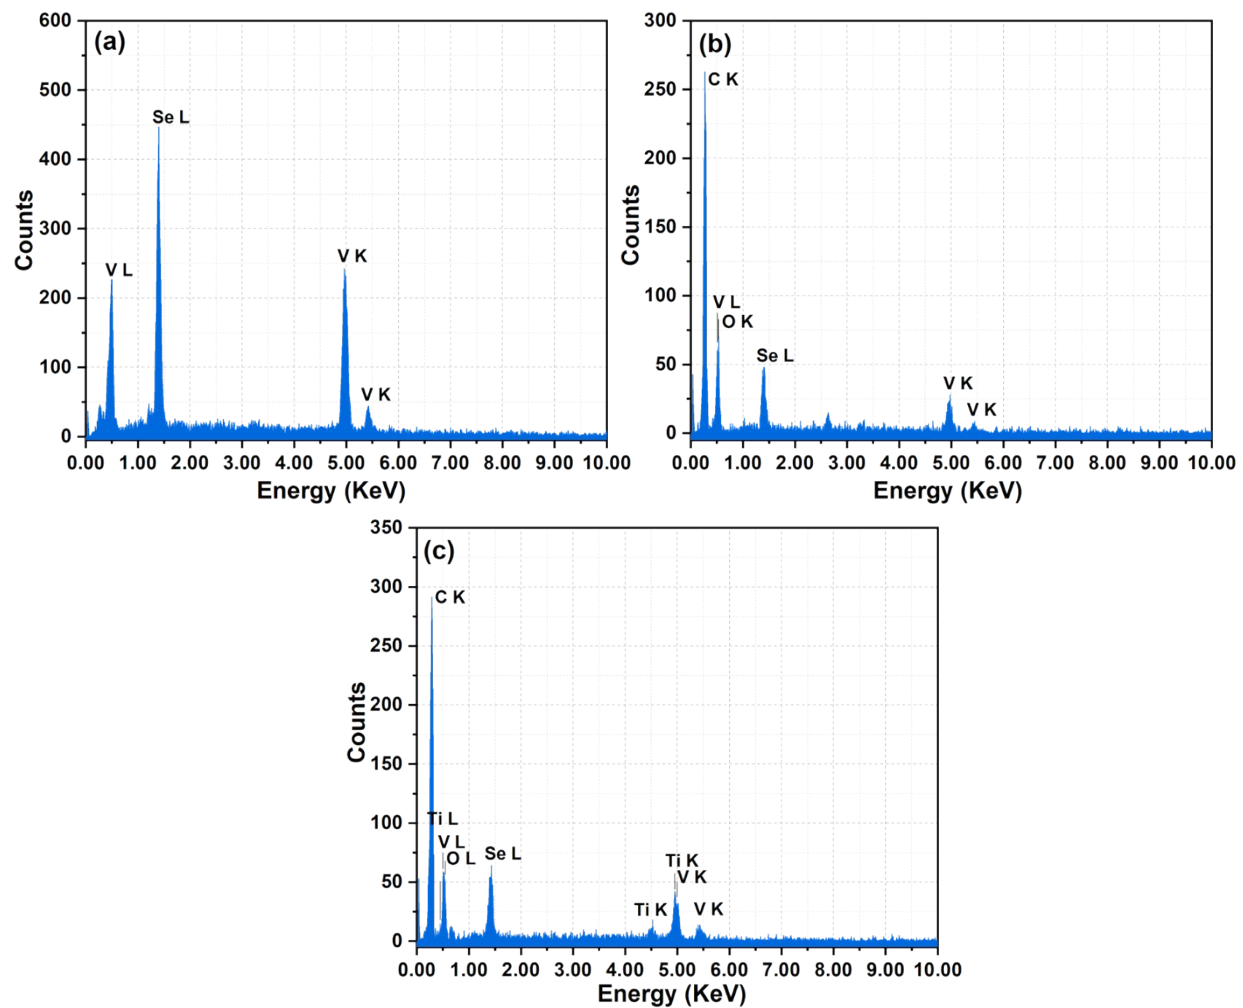

**Figure S1.** EDX spectra of (a) VSe<sub>2</sub>, (b) VSe<sub>2</sub>@G, and (c) VSe<sub>2</sub>@G/MXe.

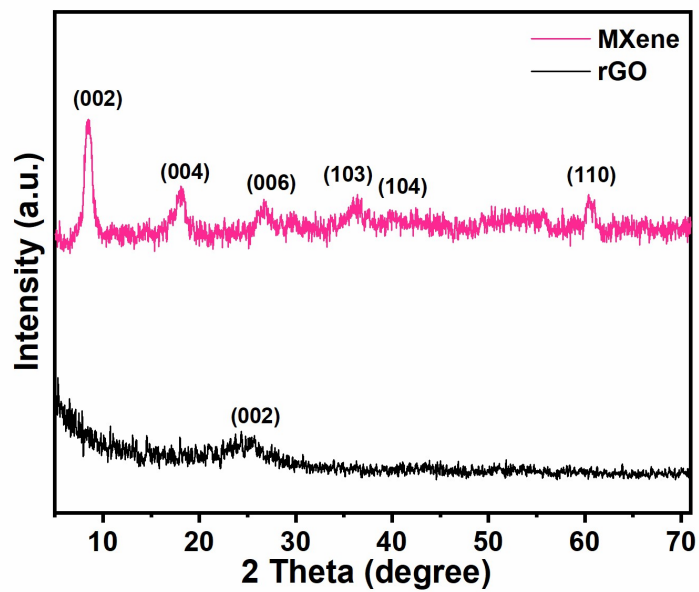

Figure S2. XRD patterns of (a) MXene and (b) rGO.

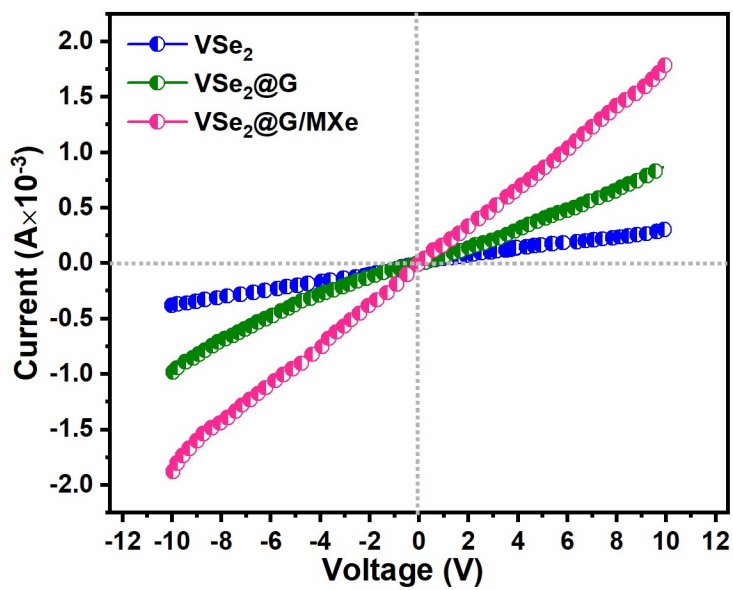

Figure S3. I-V profiles of VSe<sub>2</sub>, VSe<sub>2</sub>@G, and VSe<sub>2</sub>@G/MXe.

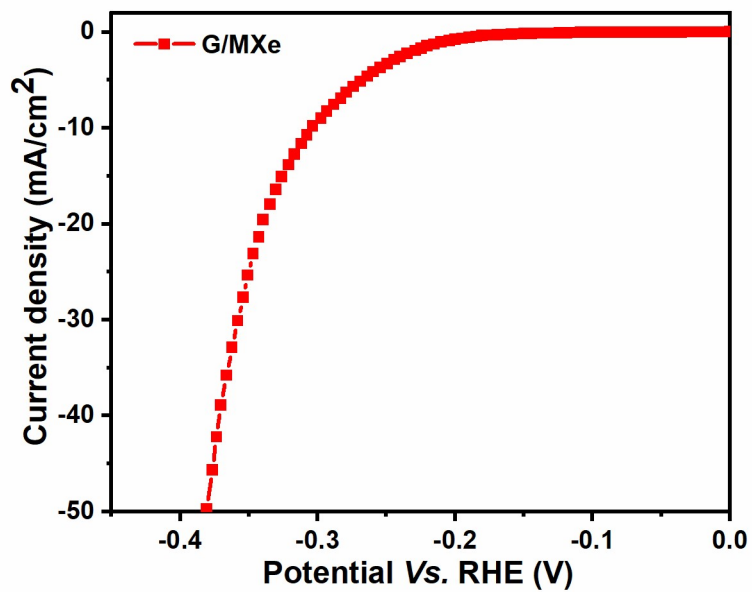

Figure S4. LSV curve of G/MXe for HER.

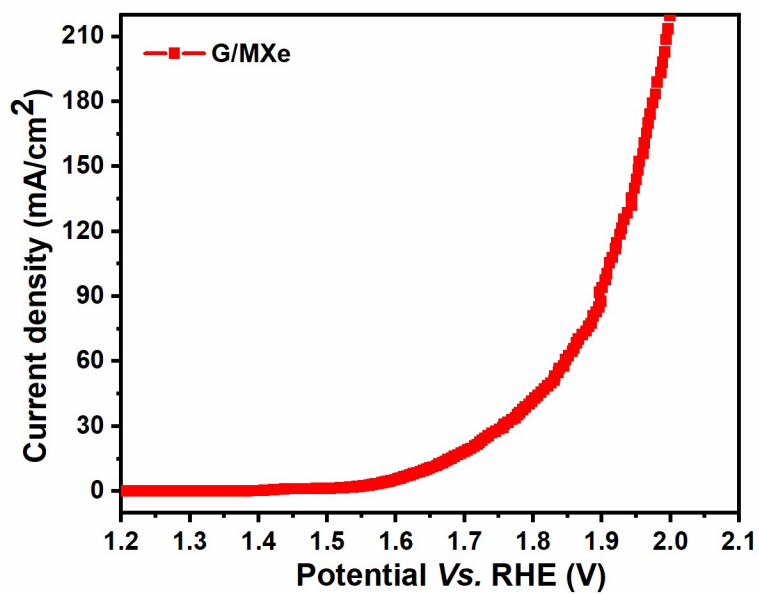

Figure S5. LSV curve of G/MXe for OER.

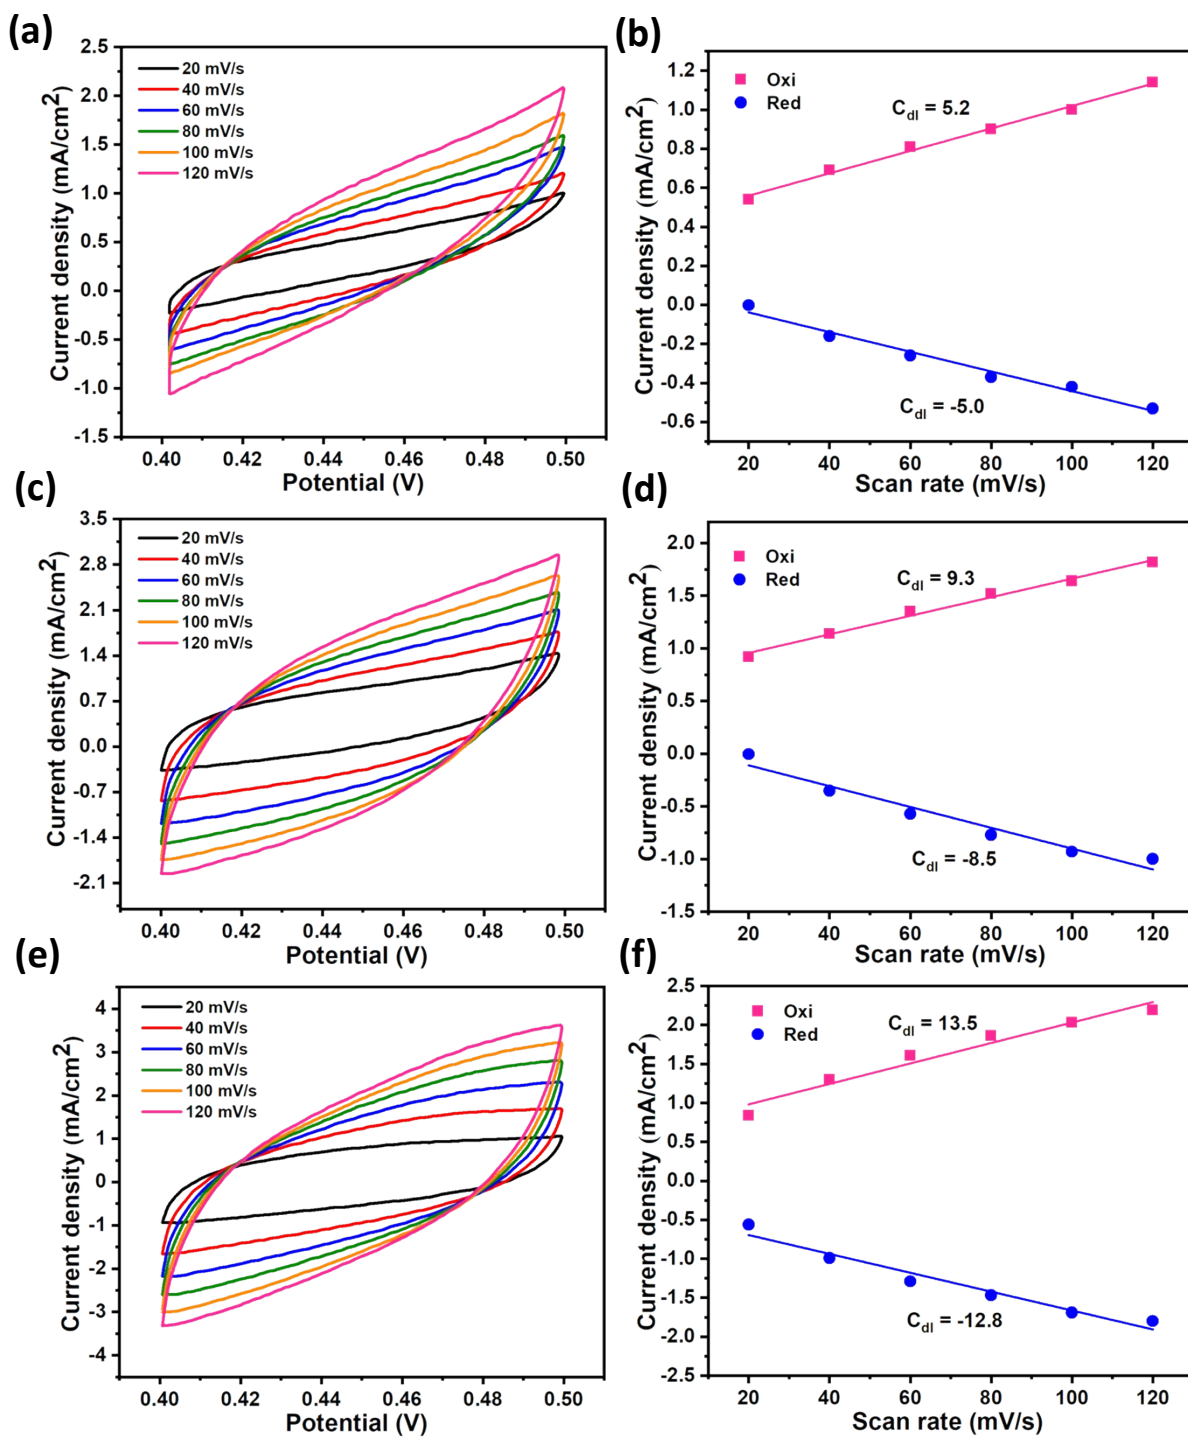

**Figure S6.**  $C_{dl}$  results for  $VSe_2$ ,  $VSe_2@G$ , and  $VSe_2@G/MXe$ ; (a, c, e) CV plots obtained at different scan rates (20-120 mV/s) and (b, d, f) scan rates vs current density plots for anodic and cathodic scans.

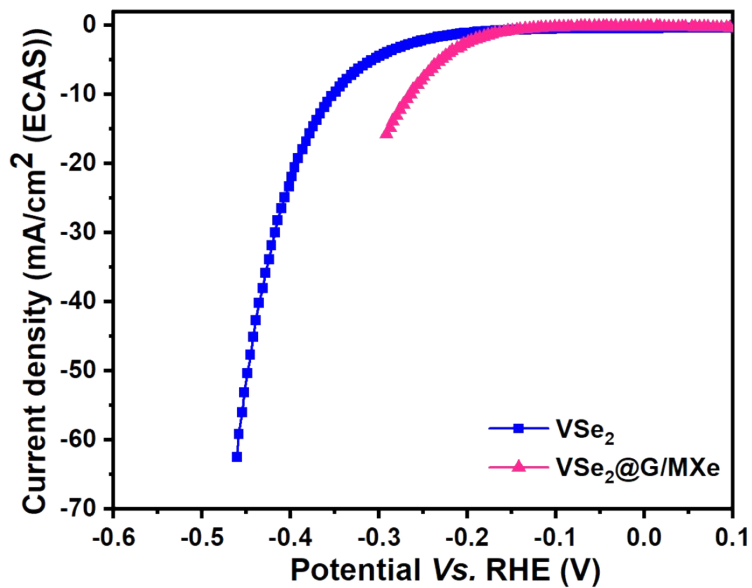

**Figure S7.** ECAS-normalized LSV curves of VSe<sub>2</sub> and VSe<sub>2</sub>@G/MXe for HER.

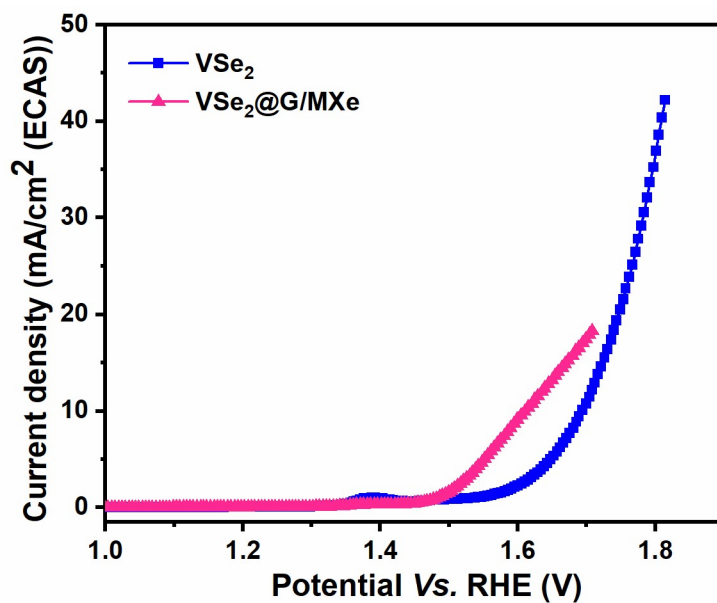

**Figure S8.** ECAS-normalized LSV curves of VSe<sub>2</sub> and VSe<sub>2</sub>@G/MXe for OER.

**Table S1.** Comparison of HER performance of VSe<sub>2</sub>@G/MXe with recently reported electrocatalysts.

| Catalyst                                            | Current density (mA/cm <sup>2</sup> ) | Overpotential/ $\eta$ (mV) | Tafel slope (mV/dec) | Reference    |
|-----------------------------------------------------|---------------------------------------|----------------------------|----------------------|--------------|
| Co-VSe <sub>2</sub>                                 | 10                                    | 230                        | 63.4                 | 1            |
| VSe <sub>2</sub> -MF-NS/CC                          | 10                                    | 295                        | 125                  | 2            |
| VSSe Alloy                                          | 10                                    | 180                        | 87                   | 3            |
| W <sub>x</sub> V <sub>1-x</sub> Se <sub>2</sub> /CC | 10                                    | 173                        | 80                   | 4            |
| V <sub>8</sub> C <sub>7</sub> @Graphene             | 10                                    | 156                        | 89.4                 | 5            |
| VB <sub>2</sub>                                     | 10                                    | 192                        | 68                   | 6            |
| VS <sub>4</sub> /rGO                                | 10                                    | 210                        | 73                   | 7            |
| VSe <sub>2</sub> @G/MXe                             | 10                                    | 153                        | 84                   | Current work |

**Table S2.** Comparison of OER performance of VSe<sub>2</sub>@G/MXe with recently reported electrocatalysts.

| Catalyst                                                             | Current density (mA/cm <sup>2</sup> ) | Overpotential/ $\eta$ (mV) | Tafel slope (mV/dec) | Reference    |
|----------------------------------------------------------------------|---------------------------------------|----------------------------|----------------------|--------------|
| VS <sub>2</sub> -rGO (r-V5)                                          | 10                                    | 300.58                     | 229.9                | 8            |
| VTe-CNT                                                              | 10                                    | 278                        | -                    | 9            |
| Co <sub>0.67</sub> V <sub>0.33</sub> P@CC                            | 10                                    | 290                        | 55.59                | 10           |
| C@Ag-V <sub>2</sub> O <sub>5</sub>                                   | 10                                    | 388                        | 71                   | 11           |
| CoV <sub>2</sub> O <sub>6</sub> -V <sub>2</sub> O <sub>5</sub> /NRGO | 10                                    | 239                        | 49.7                 | 12           |
| VSe <sub>2</sub> @rGO                                                | 10                                    | 280                        | 77                   | 13           |
| Co <sub>0.75</sub> V <sub>0.25</sub> -HNNs                           | 10                                    | 268                        | 80                   | 14           |
| VSe <sub>2</sub> @G/MXe                                              | 10                                    | 241                        | 87                   | Current work |

## References

- (1) Zhu, Q.; Shao, M.; Yu, S. H.; Wang, X.; Tang, Z.; Chen, B.; Cheng, H.; Lu, Z.; Chua, D.; Pan, H. One-pot synthesis of Co-doped VSe<sub>2</sub> nanosheets for enhanced hydrogen evolution reaction. *ACS Applied Energy Materials* **2018**, 2 (1), 644-653.
- (2) Miao, C.; Zhang, T.; Li, F.; Zhang, L.; Sun, J.; Liu, D.; Wu, L.; Wang, H.; Chen, F.; He, L. Defect-engineered three-dimensional vanadium diselenide microflowers/nanosheets on carbon cloth by chemical vapor deposition for high-performance hydrogen evolution reaction. *Nanotechnology* **2021**, 32 (26), 265402.

- (3) Hu, P.; Long, G.; Chaturvedi, A.; Wang, S.; Tan, K.; He, Y.; Zheng, L.; Liu, G.; Ke, Y.; Zhou, Y. Agent-assisted VSSe ternary alloy single crystals as an efficient stable electrocatalyst for the hydrogen evolution reaction. *Journal of Materials Chemistry A* **2019**, 7 (26), 15714-15721.
- (4) Kumar, G. M.; Cho, H.; Ilanchezhian, P.; Lee, D.; Jeon, H.; Walke, P. D.; Kim, D.; Kang, T. 3D flexible  $W_xV_{1-x}Se_2$  nanoplates arrays on carbon cloth as an novel efficient hydrogen evolution electrocatalysts. *Applied Surface Science* **2021**, 540, 148297.
- (5) Fu, W.; Wang, Y.; Zhang, H.; He, M.; Fang, L.; Yang, X.; Huang, Z.; Li, J.; Gu, X.; Wang, Y. Epitaxial growth of graphene on  $V_8C_7$  nanomeshes for highly efficient and stable hydrogen evolution reaction. *Journal of catalysis* **2019**, 369, 47-53.
- (6) Jothi, P. R.; Zhang, Y.; Yubuta, K.; Culver, D.; Conley, M.; Fokwa, B. Abundant vanadium diboride with graphene-like boron layers for hydrogen evolution. *ACS Applied Energy Materials* **2018**, 2 (1), 176-181.
- (7) Das, J. K.; Samantara, A. K.; Nayak, A. K.; Pradhan, D.; Behera, J.  $VS_2$ : an efficient catalyst for an electrochemical hydrogen evolution reaction in an acidic medium. *Dalton Transactions* **2018**, 47 (39), 13792-13799.
- (8) Bhosale, M.; Thangarasu, S.; Murugan, N.; Kim, Y. A.; Oh, T.-H. Engineering 2D heterostructured  $VS_2$ -rGO-Ni nanointerface to stimulate electrocatalytic water splitting and supercapacitor applications. *Journal of Energy Storage* **2023**, 73, 109133.
- (9) Bano, N.; Manzoor, S.; Sami, A.; Shah, S. I. A.; Junaid, A.; Rehman, M. Y. U.; Alshgari, R. A.; Ehsan, M. F.; Ashiq, M. N. Fabrication of vanadium telluride anchored on carbon nanotubes nanocomposite for overall water splitting. *Journal of the American Ceramic Society* **2024**.
- (10) Han, H.; Yi, F.; Choi, S.; Kim, J.; Kwon, J.; Park, K.; Song, T. Self-supported vanadium-incorporated cobalt phosphide as a highly efficient bifunctional electrocatalyst for water splitting. *Journal of Alloys and Compounds* **2020**, 846, 156350.
- (11) Irshad, A.; Zulfiqar, S.; Alothman, Z. A.; Shakir, I.; Warsi, M. F.; Cochran, E. W. Synergy of zero-dimensional carbon dots decoration on the one-dimensional architecture of Ag-doped  $V_2O_5$  for supercapacitor and overall water-splitting applications. *Fuel* **2024**, 362, 130705.
- (12) Shen, F.-C.; Wang, Y.; Tang, Y.-J.; Li, S.-L.; Wang, Y.-R.; Dong, L.-Z.; Li, Y.-F.; Xu, Y.; Lan, Y.-Q.  $CoV_2O_6-V_2O_5$  coupled with porous N-doped reduced graphene oxide composite as a highly efficient electrocatalyst for oxygen evolution. *ACS Energy Letters* **2017**, 2 (6), 1327-1333.



- (13) Samal, R.; Shinde, P. V.; Rout, C. S. 2D Vanadium diselenide supported on reduced graphene oxide for water electrolysis: a comprehensive study in alkaline media. *Emergent Materials* **2021**, *4* (4), 1047-1053.
- (14) Yang, M.; Fu, X.; Shao, M.; Wang, Z.; Cao, L.; Gu, S.; Li, M.; Cheng, H.; Li, Y.; Pan, H. Cobalt-Vanadium Hydroxide Nanoneedles with a Free-Standing Structure as High-Performance Oxygen Evolution Reaction Electrocatalysts. *ChemElectroChem* **2019**, *6* (7), 2050-2055.
